# Supplementary material for: The first-principles study of nH–VSn complex: impurity effects on p-type SnO monolayer
Source: Royal Society of Chemistry journal article supplement (doi:10.1039/d0cp00776e), 2020-01-01
Supplement: d0cp00776e1.pdf [file d0cp00776e1.pdf]

## The first-principles study of nH-V<sub>Sn</sub> complex impurities effects in p-type SnO monolayer

Lin Xue,<sup>\*a,b</sup> ZhiYang,<sup>a,b</sup> Bo Chen,<sup>a,b</sup> HuiLi,<sup>a,b</sup> and Jihua Zhang,<sup>\*c</sup>

College of Physics and Optoelectronics, Taiyuan University of Technology, Taiyuan 030024, P. R. China. E-mail: xuelin@tyut.edu.cn.

Key Laboratory of Advanced Transducers and Intelligent Control System, Ministry of Education, Shanxi Province, Taiyuan University of Technology, Taiyuan 030024, P. R. China.

Guizhou Provincial Key Laboratory of Computational Nano-Material Science, Guizhou Education University, Guiyang 550018, P. R. China. E-mail: wuli8@163.com.

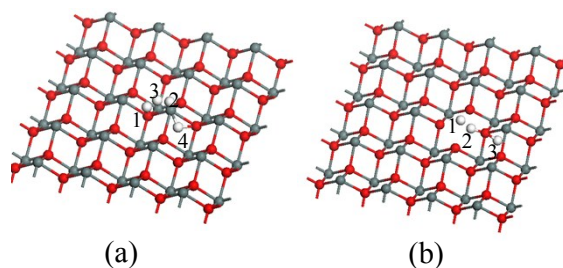

Fig. S1 (a) four initial positions for H atom in H<sub>i</sub>, (b) three initial positions for H atom in H-V<sub>Sn</sub>.

Table. S1 The total energies in different charge states for four H<sub>i</sub> initial positions in Fig. S1(a) and three H-V<sub>Sn</sub> initial positions in Fig. S1(b) after relax.

|    | total energy(eV) for H <sub>i</sub> |           |           |           | total energy(eV) for H-V <sub>Sn</sub> |           |           |
|----|-------------------------------------|-----------|-----------|-----------|----------------------------------------|-----------|-----------|
|    | 1                                   | 2         | 3         | 4         | 1                                      | 2         | 3         |
| 0  | -364.8996                           | -364.9157 | -364.1463 | -365.1927 | -358.4531                              | -361.3345 | -360.7871 |
| -1 | -365.9629                           | -367.1982 | -366.5177 | -366.0481 | -361.3043                              | -364.0821 | -363.4637 |
| +1 | -363.7871                           | -363.6252 | -362.2930 | -363.8007 | -                                      | --        | --        |

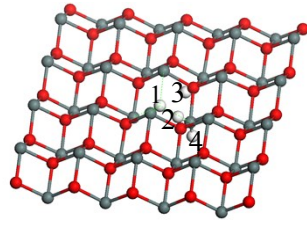

Fig. S2 Four initial positions for H atom in H-V<sub>O</sub>.

Table. S2 The total energies for four H-V<sub>O</sub> initial positions in Fig. S2 after relax.

| position | total energy(eV) |
|----------|------------------|
| 1        | -357.0911        |
| 2        | -357.2232        |
| 3        | -356.3364        |
| 4        | -356.9181        |

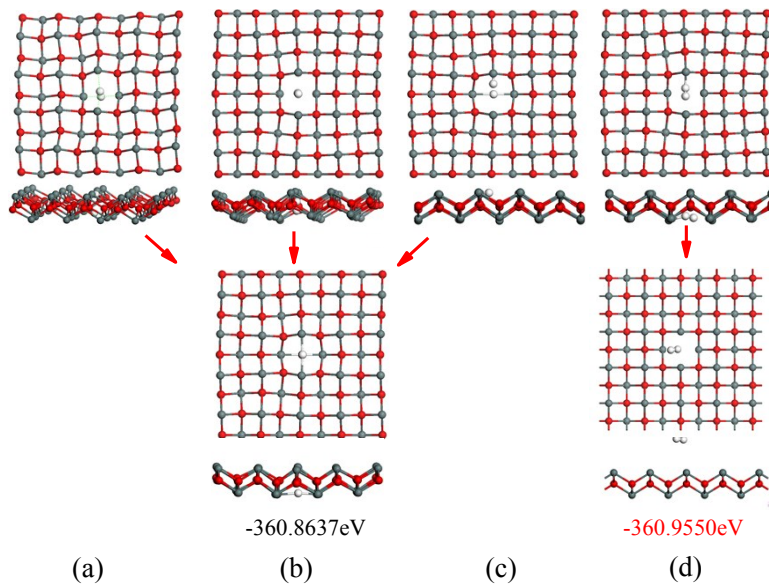

Fig .S3 The top and side view of four initial positions(top) for H atoms in 2H-V<sub>O</sub> and their relax results(bottom) with total energies.

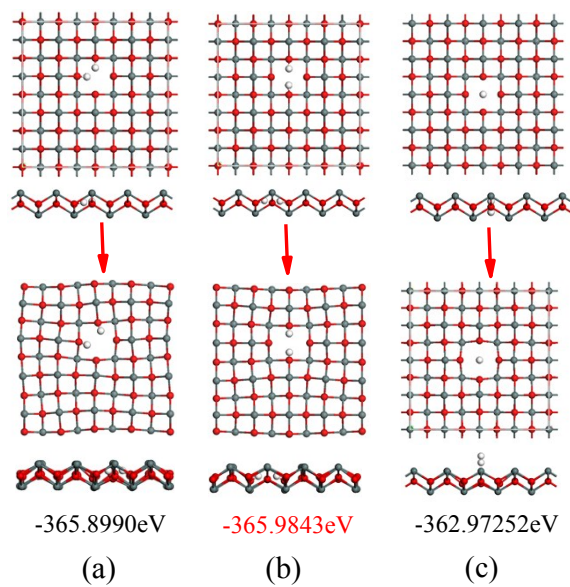

Fig. S4 The top and side view of three initial positions(top) for H atoms in 2H-V<sub>Sn</sub> and their relax results(bottom) with total energies.

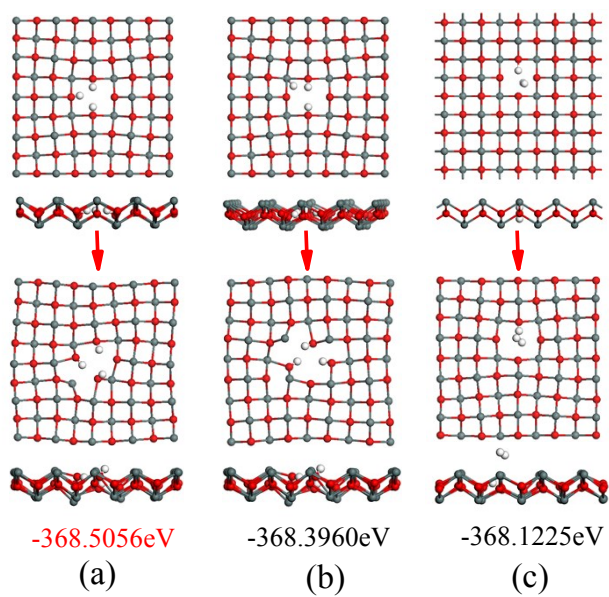

Fig. S5 The top and side view of three initial positions(top) for H atoms in 3H-V<sub>Sn</sub> and their relax results(bottom) with total energies.

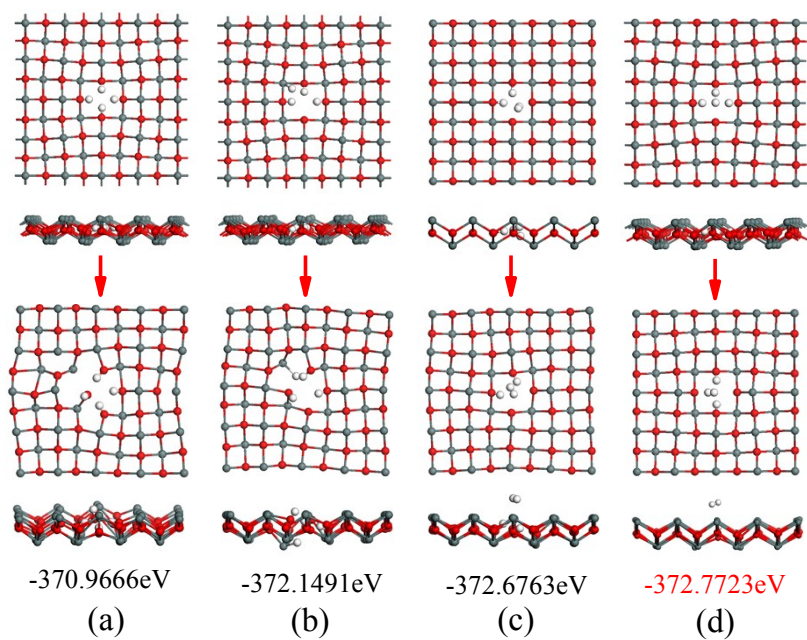

Fig. S6 The top and side view of four initial positions(top) for H atoms in 4H-V<sub>Sn</sub> and their relax results(bottom) with total energies.
